# Supplementary material for: Preoperative Mutational Analysis of Circulating Tumor Cells (CTCs) and Plasma-cfDNA Provides Complementary Information for Early Prediction of Relapse: A Pilot Study in Early-Stage Non-Small Cell Lung Cancer
Source: MDPI journal article supplement (doi:10.3390/cancers15061877), 2023-03-21
Supplement: s1 [file s1]

**Suppl. Table S1:** Adjuvant Therapy of each patient after surgery.

|     | Adjuvant Therapy |                           |              |              |
|-----|------------------|---------------------------|--------------|--------------|
|     | Chemotherapy     |                           |              | RadioTherapy |
| A/A | YES / NO         | THERAPY                   | No of cycles | Yes/ No      |
| 1   | NO               |                           |              | NO           |
| 2   | YES              | Paclitaxel / Carboplan    | 4            | NO           |
| 3   | YES              | Cisplatin / Navelbine     | 3            | NO           |
| 4   | NO               |                           |              | NO           |
| 5   | NO               |                           |              | NO           |
| 6   | NO               |                           |              | NO           |
| 7   | NO               |                           |              | NO           |
| 8   | YES              | Carboplatin / Vinorelbine | 6            | NO           |
| 9   | NAI              | Carboplatin / Navelbine   | 4            | NO           |
| 10  | YES              | Navelbine / Carboplan     | 4            | NO           |
| 11  | YES              | Navelbine / Carboplan     | 4            | NO           |
| 12  | NAI              | Carboplatin / Navelbine   | 4            | NO           |
| 13  | YES              | Cisplatin / Navelbine     | 4            | NO           |
| 14  | YES              | Cisplatin / Navelbine     | 4            | NO           |
| 15  | NO               |                           |              | NO           |
| 16  | YES              | Navelbine / Carboplatin   | 4            | NO           |
| 17  | YES              | Carboplatin / Etoposide   | 4            | NO           |
| 18  | YES              | Vinorelbine / Carboplatin | 4            | YES          |
| 19  | YES              | Carboplatin / Vinorelbine | 4            | NO           |
| 20  | YES              | Cisplatin / Navelbine     | 4            | NO           |
| 21  | YES              | Carboplatin / Navelbine   | 4            |              |
| 22  | NO               |                           |              | NO           |
| 23  | YES              | Navelbine                 | 4            | YES          |
| 24  | YES              | Carboplatin / Navelbine   | 4            | NO           |
| 25  | YES              | Carbo/Alimta              | 4            | NO           |
| 26  | NO               |                           |              | NO           |
| 27  | YES              | Cisplatin / Navelbine     | 4            | NO           |
| 28  | NO               |                           |              | YES          |
| 29  | YES              | Cisplatin / Vinorelbine   | 4            | NO           |
| 30  | NO               |                           |              | NO           |
| 31  | YES              | Cisplatin / Navelbine     | 4            | NO           |
| 32  | YES              | Cisplatin / Navelbine     | 4            | YES          |
| 33  | YES              | Cisplatin / Navelbine     | 4            | NO           |
| 34  | YES              | Carboplatin / Navelbine   | 4            | NO           |
| 35  | YES              | Carboplatin / Navelbine   | 4            | YES          |
| 36  | NO               |                           |              | NO           |
| 37  | YES              | Carboplatin / Navelbine   | 4            | YES          |

|    |     |                 |   |    |
|----|-----|-----------------|---|----|
| 38 | NO  |                 |   | NO |
| 39 | NO  |                 |   | NO |
| 40 | NO  | Carbo/Navelbine | 4 | NO |
| 41 | YES |                 |   | NO |
| 42 | NO  |                 |   | NO |
| 43 | NO  |                 |   | NO |
| 44 | YES | Carbo/Navelbine | 4 | NO |
| 45 | NO  |                 |   | NO |
| 46 | YES | Carbo/Navelbine | 4 | NO |
| 47 | NO  |                 |   | NO |
| 48 | NO  |                 |   | NO |
| 49 | NO  |                 |   | NO |

**Suppl. Table S2:** Multivariate analysis for RFS and OS for NSCLC patients

| <b>RFS</b>                                                |                             |                |
|-----------------------------------------------------------|-----------------------------|----------------|
| Treatment (radiotherapy vs chemotherapy)                  | 1.472 (0.306-7.086)         | P=0.618        |
| Histology (Non-Adeno vs Adeno)                            | 1.156 (0.430-3.110)         | P=0.960        |
| Stage (I vs II/IIIA)                                      | 1.831 (0.705-4.759)         | P=0.215        |
| Size (>5cm vs ≤5cm)                                       | 0.884 (0.288-2.714)         | P=0.830        |
| Smoking (Yes vs No)                                       | 0.294 (0.053-1.624)         | P=0.294        |
| Lymph nodes (0 vs <1)                                     | 1.691 (0.569-5.024)         | P=0.345        |
| At least one mutation in CTC-derived DNA (yes vs no)      | 1.536 (0.592-3.986)         | P=0.378        |
| <b>At least one mutation in plasma-ct DNA (yes vs no)</b> | <b>3.990 (1.312-12.133)</b> | <b>P=0.015</b> |
| <b>OS</b>                                                 |                             |                |
| Treatment (radiotherapy vs chemotherapy)                  | 0.996 (0.915-1.084)         | P=0.924        |
| Histology (Non-Adeno vs Adeno)                            | 0.712 (0.178-2.856)         | P=0.632        |
| Stage (I vs II/IIIA)                                      | 4.770 (0.531-42.854)        | P=0.115        |
| Size (>5cm vs ≤5cm)                                       | 1.704 (0.324-8.962)         | P=0.529        |
| Smoking (Yes vs No)                                       | 1.620 (0.267-9.810)         | P=0.596        |
| Lymph nodes (0 vs <1)                                     | 1.912 (0.317-11.545)        | P=0.492        |
